# Supplementary material for: General response of Salmonella enterica serovar Typhimurium to desiccation: A new role for the virulence factors sopD and sseD in survival
Source: PubMed Central journal article supplement (PMC5678696; doi:10.1371/journal.pone.0187692), 2017-11-08
Supplement: pone.0187692.s002.pdf [file pone.0187692.s002.pdf]

| <b>Gene</b> | <b>Primer ID</b>        | <b>Primer Sequence (5'-3')</b> | <b>Direction</b> |
|-------------|-------------------------|--------------------------------|------------------|
| <i>sopD</i> | <i>sopD</i> -350verifFW | CTTCAGAAATATTTACCCCACG         | Forward          |
|             | <i>sopD</i> +350verifRV | GGCGTGTTTAAAGTGCTACC           | Reverse          |
| <i>sseD</i> | <i>sseD</i> -350verifFW | GAGGGATTGTTCAATTTAAAGGC        | Forward          |
|             | <i>sseD</i> +350verifRV | CAGGATGCGCAATAATTCC            | Reverse          |
