# Supplementary material for: General response of Salmonella enterica serovar Typhimurium to desiccation: A new role for the virulence factors sopD and sseD in survival
Source: PubMed Central journal article supplement (PMC5678696; doi:10.1371/journal.pone.0187692), 2017-11-08
Supplement: pone.0187692.s003.pdf [file pone.0187692.s003.pdf]

## Down-regulated genes

| Locus   | Gene name   | Function                                                           | Fold change |
|---------|-------------|--------------------------------------------------------------------|-------------|
| STM2970 | <i>sdaC</i> | serine transport protein                                           | -14.6       |
| STM3975 | <i>tatC</i> | twin-arginine protein translocation system subunit TatC            | -13.1       |
| STM0579 | <i>ybdF</i> | hypothetical protein                                               | -13.1       |
| STM2256 | <i>napB</i> | citrate reductase cytochrome c-type subunit                        | -13.1       |
| STM1455 | <i>ydgP</i> | electron transport complex protein RnfG                            | -12.4       |
| STM4385 | <i>ptxA</i> | PTS system L-ascorbate-specific transporter subunit IIA            | -11.7       |
| STM3473 | <i>yhfC</i> | hypothetical protein                                               | -11.7       |
| STM1007 | STM1007     | hypothetical protein                                               | -11.7       |
| STM1045 | STM1045     | minor tail protein                                                 | -10.2       |
| STM3665 | <i>avtA</i> | valine--pyruvate transaminase                                      | -10.2       |
| STM2163 | <i>yehX</i> | ABC-type proline/glycine betaine transport system ATPase component | -10.2       |
| STM4557 | <i>holD</i> | DNA polymerase III subunit psi                                     | -10.2       |
| STM0302 | <i>safD</i> | fimbrial subunit                                                   | -8.8        |
| STM0271 | STM0271     | hypothetical protein                                               | -8.8        |
| STM0813 | <i>ybhP</i> | hypothetical protein                                               | -8.8        |
| STM0696 | <i>ybfF</i> | hypothetical protein                                               | -8.0        |
| STM3054 | <i>gcvH</i> | glycine cleavage system protein H                                  | -8.0        |
| STM0761 | STM0761     | fumarate hydratase                                                 | -7.3        |
| STM4412 | STM4412     | permease                                                           | -7.3        |
| STM1619 | STM1619     | cryptic aminoglycoside resistance gene                             | -7.3        |
| STM1982 | <i>rcaA</i> | colanic acid capsular biosynthesis activation protein A            | -7.3        |
| STM3930 | <i>yifK</i> | transporter                                                        | -7.3        |
| STM2799 | <i>stpA</i> | DNA binding protein                                                | -7.3        |
| STM3830 | <i>dgoR</i> | galactonate operon transcriptional repressor                       | -7.3        |
| STM2832 | <i>srlA</i> | glucitol/sorbitol-specific enzyme IIC component                    | -7.3        |
| STM4019 | <i>yihQ</i> | alpha-glucosidase                                                  | -7.3        |
| STM3454 | <i>slyX</i> | hypothetical protein                                               | -6.8        |
| STM2221 | <i>bcr</i>  | bicyclomycin/multidrug efflux system protein                       | -6.8        |
| STM3378 | STM3378     | sulfite oxidase subunit YedZ                                       | -6.8        |
| STM3153 | <i>yqhA</i> | hypothetical protein                                               | -6.6        |
| STM0361 | STM0361     | cytochrome BD2 subunit II                                          | -6.3        |
| STM2104 | <i>cpsG</i> | phosphomannomutase                                                 | -6.3        |
| STM1575 | STM1575     | transcriptional regulator                                          | -6.3        |
| STM0984 | <i>msbA</i> | lipid transporter ATP-binding/permease                             | -6.3        |
| STM1369 | <i>sufA</i> | iron-sulfur cluster assembly scaffold protein                      | -6.1        |
| STM2927 | <i>surE</i> | stationary phase survival protein SurE                             | -5.8        |
| STM3658 | <i>yiaH</i> | inner membrane protein                                             | -5.8        |
| STM2106 | <i>wcaI</i> | glycosyl transferase family protein                                | -5.8        |
| STM3720 | <i>yibR</i> | inner membrane protein                                             | -5.8        |
| STM2546 | <i>suhB</i> | inositol monophosphatase                                           | -5.8        |
| STM0658 | <i>ybeV</i> | molecular chaperone                                                | -5.8        |
| STM4104 | STM4104     | 5'-nucleotidase                                                    | -5.8        |
| STM0875 | <i>rimK</i> | ribosomal protein S6 modification protein                          | -5.8        |

|         |             |                                                                  |      |
|---------|-------------|------------------------------------------------------------------|------|
| STM1675 | STM1675     | oxidoreductase                                                   | -5.8 |
| STM1545 | STM1545     | multidrug efflux protein                                         | -5.8 |
| STM4566 | <i>yjjI</i> | hypothetical protein                                             | -5.8 |
| STM1346 | <i>ydiE</i> | hypothetical protein                                             | -5.8 |
| STM1247 | STM1247     | tRNA-Arg                                                         | -5.8 |
| STM0435 | <i>yajQ</i> | nucleotide-binding protein                                       | -5.8 |
| STM0432 | <i>phnX</i> | phosphonoacetaldehyde hydrolase                                  | -5.8 |
| STM1471 | <i>rstB</i> | sensor protein RstB                                              | -5.8 |
| STM1755 | <i>ychJ</i> | hypothetical protein                                             | -5.6 |
| STM2023 | <i>cbiM</i> | cobalt transport protein CbiM                                    | -5.4 |
| STM0206 | <i>btuF</i> | vitamin B12-transporter protein BtuF                             | -5.1 |
| STM3329 | <i>yhcC</i> | FeS oxidoreductase                                               | -5.1 |
| STM1456 | <i>rnfD</i> | electron transport complex protein RnfD                          | -5.1 |
| STM3101 | <i>yggT</i> | integral membrane protein                                        | -5.1 |
| STM0162 | STM0162     | inner membrane protein                                           | -5.1 |
| STM3960 | <i>rhtB</i> | homoserine/homoserine lactone efflux protein                     | -5.1 |
| STM0793 | <i>bioA</i> | adenosylmethionine--8-amino-7-oxononanoate aminotransferase      | -4.9 |
| STM3959 | <i>rhtC</i> | threonine efflux system                                          | -4.9 |
| STM1775 | <i>hemK</i> | N5-glutamine S-adenosyl-L-methionine-dependent methyltransferase | -4.9 |
| STM3016 | <i>araE</i> | L-arabinose/proton symport protein                               | -4.7 |
| STM1320 | <i>ydjN</i> | kinase/transporter-like protein                                  | -4.7 |
| STM0502 | <i>ybbL</i> | ABC transporter ATP-binding protein                              | -4.7 |
| STM2816 | STM2816     | glycoporin                                                       | -4.4 |
| STM1242 | <i>envE</i> | envelope protein                                                 | -4.4 |
| STM1975 | <i>fliL</i> | flagellar basal body-associated protein FliL                     | -4.4 |
| STM1418 | <i>ssaQ</i> | type III secretion system protein                                | -4.4 |
| STM2754 | STM2754     | hexulose 6 phosphate synthase                                    | -4.4 |
| STM3383 | <i>prmA</i> | 50S ribosomal protein L11 methyltransferase                      | -4.4 |
| STM1343 | <i>nlpC</i> | lipoprotein                                                      | -4.4 |
| STM0948 | STM0948     | hypothetical protein                                             | -4.4 |
| STM1429 | <i>ydhB</i> | DNA-binding transcriptional regulator                            | -4.4 |
| STM2823 | STM2823     | tRNA-Arg                                                         | -4.4 |
| STM2848 | <i>hycF</i> | formate hydrogenlyase complex iron-sulfur subunit                | -4.4 |
| STM1223 | <i>potC</i> | spermidine/putrescine ABC transporter membrane protein           | -4.4 |
| STM1154 | <i>yceE</i> | drug efflux system protein MdtG                                  | -4.4 |
| STM2022 | <i>cbiN</i> | cobalt transport protein CbiN                                    | -4.4 |
| STM1694 | <i>sapC</i> | peptide transport protein                                        | -4.4 |
| STM4271 | STM4271     | inner membrane protein                                           | -4.4 |
| STM3160 | STM3160     | inner membrane protein                                           | -4.4 |
| STM1808 | STM1808     | hypothetical protein                                             | -4.4 |
| STM4139 | <i>coaA</i> | pantothenate kinase                                              | -4.4 |
| STM3277 | STM3277     | inner membrane protein                                           | -4.4 |
| STM2937 | <i>ygbF</i> | hypothetical protein                                             | -4.4 |
| STM4141 | STM4141     | hypothetical protein                                             | -4.4 |
| STM1856 | STM1856     | hypothetical protein                                             | -4.4 |

|           |             |                                                                                        |      |
|-----------|-------------|----------------------------------------------------------------------------------------|------|
| STM1858   | STM1858     | hypothetical protein                                                                   | -4.4 |
| STM1037   | STM1037     | minor tail protein                                                                     | -4.4 |
| STM4276   | STM4276     | hypothetical protein                                                                   | -4.4 |
| STM1219   | <i>ycfW</i> | outer membrane-specific lipoprotein transporter subunit LolE                           | -4.4 |
| STM4401   | <i>ytfG</i> | reductase                                                                              | -4.4 |
| STM0381   | STM0381     | inner membrane protein                                                                 | -4.4 |
| STM2308   | <i>yfbB</i> | acyl-CoA thioester hydrolase YfbB                                                      | -4.4 |
| STM2118   | <i>wza</i>  | outer membrane polysaccharide export protein                                           | -4.4 |
| STM0699   | STM0699     | hypothetical protein                                                                   | -4.4 |
| STM0138   | <i>yacG</i> | zinc-binding protein                                                                   | -4.4 |
| STM2508   | STM2508     | hypothetical protein                                                                   | -4.4 |
| STM2527   | STM2527     | polyferredoxin                                                                         | -4.4 |
| STM0033   | STM0033     | 5'-nucleotidase                                                                        | -4.4 |
| STM0087   | <i>folA</i> | dihydrofolate reductase                                                                | -4.4 |
| STM1725   | <i>trpC</i> | bifunctional indole-3-glycerol phosphate synthase/phosphoribosylanthranilate isomerase | -4.1 |
| STM2846   | <i>hycH</i> | hydrogenase 3 large subunit processing protein                                         | -4.1 |
| STM1678   | STM1678     | 2'-hydroxyisoflavone reductase                                                         | -4.1 |
| STM2641   | <i>nadB</i> | L-aspartate oxidase                                                                    | -4.0 |
| STM0758   | <i>ybgR</i> | zinc transporter ZitB                                                                  | -4.0 |
| STM3120   | STM3120     | transcriptional regulator                                                              | -4.0 |
| STM2691   | STM2691     | ABC transporter                                                                        | -4.0 |
| STM1123   | STM1123     | hypothetical protein                                                                   | -4.0 |
| STM0746   | <i>tolR</i> | colicin uptake protein TolR                                                            | -4.0 |
| STM2018   | <i>cobU</i> | adenosylcobinamide kinase/adenosylcobinamide-phosphate guanylyltransferase             | -3.9 |
| STM0230   | <i>rnhB</i> | ribonuclease HII                                                                       | -3.9 |
| STM1026   | STM1026     | hypothetical protein                                                                   | -3.9 |
| STM0806   | <i>moaE</i> | molybdopterin guanine dinucleotide biosynthesis protein MoaE                           | -3.9 |
| STM3825   | <i>torT</i> | TMAO reductase system periplasmic protein TorT                                         | -3.8 |
| STM3725   | <i>coaD</i> | phosphopantetheine adenylyltransferase                                                 | -3.8 |
| STM3795   | <i>ilvN</i> | acetolactate synthase 1 regulatory subunit                                             | -3.8 |
| STM2833   | <i>srlE</i> | glucitol/sorbitol-specific enzyme IIB component                                        | -3.8 |
| STM2102   | <i>wzxC</i> | colanic acid exporter                                                                  | -3.7 |
| STM1649   | STM1649     | hypothetical protein                                                                   | -3.7 |
| STM0547   | <i>fimH</i> | minor fimbrial subunit                                                                 | -3.7 |
| STM0613   | STM0613     | hydrogenase protein                                                                    | -3.7 |
| STM0582   | <i>ybdJ</i> | inner membrane protein                                                                 | -3.7 |
| STM1966   | <i>yedF</i> | hypothetical protein                                                                   | -3.7 |
| STM0179   | <i>yadE</i> | xylanase/chitin deacetylase                                                            | -3.7 |
| STM0544   | <i>fimI</i> | fimbrial protein                                                                       | -3.7 |
| STM3910   | <i>ppiC</i> | peptidyl-prolyl cis-trans isomerase C                                                  | -3.7 |
| STM0983   | <i>ycaI</i> | hypothetical protein                                                                   | -3.7 |
| STM3976.S | <i>yigW</i> | DNase TatD                                                                             | -3.7 |
| STM1279   | <i>yeaM</i> | regulatory protein                                                                     | -3.7 |
| STM1064   | <i>pqiB</i> | paraquat-inducible protein B                                                           | -3.7 |

|         |             |                                                           |      |
|---------|-------------|-----------------------------------------------------------|------|
| STM2673 | <i>rplS</i> | 50S ribosomal protein L19                                 | -3.7 |
| STM2900 | <i>invH</i> | needle complex outer membrane lipoprotein precursor       | -3.5 |
| STM1133 | STM1133     | dehydrogenase                                             | -3.5 |
| STM1065 | <i>ymbA</i> | outer membrane protein                                    | -3.5 |
| STM1983 | <i>dsrB</i> | hypothetical protein                                      | -3.5 |
| STM3727 | <i>rpmG</i> | 50S ribosomal protein L33                                 | -3.4 |
| STM3529 | <i>gldA</i> | glycerol dehydrogenase                                    | -3.4 |
| STM2034 | <i>cbiB</i> | cobalamin biosynthesis protein                            | -3.4 |
| STM0109 | <i>yabN</i> | transcriptional regulator SgrR                            | -3.3 |
| STM1993 | <i>yedJ</i> | hypothetical protein                                      | -3.3 |
| STM2126 | STM2126     | multidrug efflux system subunit MdtA                      | -3.3 |
| STM1817 | <i>rnd</i>  | ribonuclease D                                            | -3.3 |
| STM2803 | STM2803     | regulatory protein                                        | -3.2 |
| STM0589 | <i>fepE</i> | ferric enterobactin transport protein FepE                | -3.2 |
| STM3620 | <i>yhjQ</i> | cell division protein                                     | -3.2 |
| STM0165 | <i>speD</i> | S-adenosylmethionine decarboxylase                        | -3.2 |
| STM3316 | <i>yrbI</i> | 3-deoxy-D-manno-octulosonate 8-phosphate phosphatase      | -3.2 |
| STM3544 | <i>yhhW</i> | hypothetical protein                                      | -3.2 |
| STM3848 | <i>yidZ</i> | DNA-binding transcriptional regulator YidZ                | -3.2 |
| STM3364 | <i>yhcP</i> | p-hydroxybenzoic acid efflux subunit AaeB                 | -3.2 |
| STM2396 | <i>pgtA</i> | activator                                                 | -3.1 |
| STM2962 | <i>gudT</i> | D-glucarate permease                                      | -3.1 |
| STM4284 | <i>yjcO</i> | hypothetical protein                                      | -3.1 |
| STM3561 | <i>livG</i> | leucine/isoleucine/valine transporter ATP-binding subunit | -3.1 |
| STM2200 | <i>lysP</i> | lysine transporter                                        | -3.1 |
| STM3692 | <i>lldP</i> | L-lactate permease                                        | -3.1 |
| STM0292 | STM0292     | RHS-like protein                                          | -3.1 |
| STM0557 | STM0557     | inner membrane protein                                    | -2.9 |
| STM1698 | STM1698     | inner membrane protein                                    | -2.9 |
| STM1699 | <i>ycjE</i> | hypothetical protein                                      | -2.9 |
| STM1843 | STM1843     | transporter                                               | -2.9 |
| STM2149 | <i>stcD</i> | outer membrane lipoprotein                                | -2.9 |
| STM0338 | <i>stbC</i> | fimbrial usher                                            | -2.9 |
| STM3096 | <i>yqgE</i> | hypothetical protein                                      | -2.9 |
| STM4113 | <i>frwB</i> | PTS system fructose-like transporter subunit EIIB         | -2.9 |
| STM3066 | <i>yggA</i> | arginine exporter protein                                 | -2.9 |
| STM0329 | STM0329     | isopropylmalate isomerase large subunit                   | -2.9 |
| STM0084 | STM0084     | sulfatase                                                 | -2.9 |
| STM2450 | <i>amiA</i> | N-acetylmuramoyl-L-alanine amidase I                      | -2.9 |
| STM1518 | <i>marB</i> | hypothetical protein                                      | -2.9 |
| STM1745 | <i>oppB</i> | oligopeptide transporter permease                         | -2.9 |
| STM1526 | <i>yneG</i> | hypothetical protein                                      | -2.9 |
| STM2617 | STM2617     | antiterminator-like protein                               | -2.9 |
| STM3026 | STM3026     | outer membrane protein                                    | -2.9 |
| STM3024 | <i>yohM</i> | nickel/cobalt efflux protein RcnA                         | -2.9 |

|           |             |                                                                                           |      |
|-----------|-------------|-------------------------------------------------------------------------------------------|------|
| STM3143   | <i>hybG</i> | hydrogenase 2 accessory protein HypG                                                      | -2.9 |
| STM4551   | STM4551     | hypothetical protein                                                                      | -2.9 |
| STM1783.S | <i>pth</i>  | peptidyl-tRNA hydrolase                                                                   | -2.9 |
| STM1579   | <i>narW</i> | nitrate reductase 2 delta subunit                                                         | -2.9 |
| STM0539   | STM0539     | inner membrane protein                                                                    | -2.9 |
| STM1156   | <i>yceA</i> | hypothetical protein                                                                      | -2.9 |
| STM0523   | <i>allB</i> | allantoinase                                                                              | -2.9 |
| STM3173   | <i>plsC</i> | 1-acyl-sn-glycerol-3-phosphate acyltransferase                                            | -2.9 |
| STM4082   | <i>yiiQ</i> | hypothetical protein                                                                      | -2.9 |
| STM2863   | <i>sitC</i> | permease                                                                                  | -2.9 |
| STM0672   | STM0672     | inner membrane protein                                                                    | -2.9 |
| STM2535   | <i>sseB</i> | enhanced serine sensitivity protein SseB                                                  | -2.9 |
| STM2776   | <i>iroE</i> | hydrolase                                                                                 | -2.9 |
| STM1425   | <i>ydhE</i> | multidrug efflux protein                                                                  | -2.9 |
| STM0884   | <i>ulaA</i> | PTS system ascorbate-specific transporter subunit IIC                                     | -2.9 |
| STM4191   | STM4191     | hypothetical protein                                                                      | -2.9 |
| STM3823   | <i>torC</i> | trimethylamine N-oxide reductase cytochrome c-like subunit                                | -2.9 |
| STM0182   | <i>panB</i> | 3-methyl-2-oxobutanoate hydroxymethyltransferase                                          | -2.9 |
| STM0181   | <i>panC</i> | pantoate--beta-alanine ligase                                                             | -2.9 |
| STM0175   | <i>stiC</i> | fimbrial usher                                                                            | -2.9 |
| STM2671   | <i>yfiR</i> | hypothetical protein                                                                      | -2.9 |
| STM2263   | <i>yojI</i> | multidrug transporter membrane protein/ATP-binding component                              | -2.9 |
| STM1385   | <i>ttrB</i> | tetrathionate reductase complex subunit B                                                 | -2.9 |
| STM3942   | STM3942     | hypothetical protein                                                                      | -2.9 |
| STM3745   | STM3745     | hypothetical protein                                                                      | -2.9 |
| STM3780   | <i>gatY</i> | fructose-1,6-bisphosphate aldolase                                                        | -2.9 |
| STM4176   | <i>purH</i> | bifunctional phosphoribosylaminoimidazolecarboxamide formyltransferase/IMP cyclohydrolase | -2.9 |
| STM4589   | <i>creC</i> | sensory histidine kinase CreC                                                             | -2.9 |
| STM0651   | STM0651     | 2-keto-3-deoxygluconate permease                                                          | -2.9 |
| STM2030   | <i>cbiT</i> | cobalt-precorrin-6Y C(15)-methyltransferase                                               | -2.9 |
| STM4473   | <i>yjgM</i> | acetyltransferase                                                                         | -2.9 |
| STM1327   | <i>ydiY</i> | outer membrane protein                                                                    | -2.9 |
| STM0657   | <i>ybeU</i> | hypothetical protein                                                                      | -2.9 |
| STM4051   | STM4051     | outer membrane protein                                                                    | -2.9 |
| STM3693   | <i>lldR</i> | DNA-binding transcriptional repressor LldR                                                | -2.9 |
| STM0707   | <i>kdpF</i> | potassium-transporting ATPase subunit F                                                   | -2.9 |
| STM1900   | <i>ntpA</i> | dATP pyrophosphohydrolase                                                                 | -2.9 |
| STM0044   | <i>yaaY</i> | hypothetical protein                                                                      | -2.9 |
| STM3444   | <i>bfd</i>  | bacterioferritin-associated ferredoxin                                                    | -2.9 |
| STM1046   | STM1046     | tail assembly protein                                                                     | -2.9 |
| STM1040   | STM1040     | minor tail protein                                                                        | -2.9 |
| STM0780   | STM0780     | hypothetical protein                                                                      | -2.9 |
| STM2249   | <i>ccmF</i> | cytochrome c-type biogenesis protein                                                      | -2.9 |
| STM4382   | <i>yjfR</i> | L-ascorbate 6-phosphate lactonase                                                         | -2.9 |

|           |             |                                                     |      |
|-----------|-------------|-----------------------------------------------------|------|
| STM0035   | STM0035     | arylsulfatase                                       | -2.9 |
| STM2807   | <i>nrdE</i> | ribonucleotide-diphosphate reductase subunit alpha  | -2.9 |
| STM1910   | STM1910     | penicillin-binding protein                          | -2.9 |
| STM0704   | <i>kdpC</i> | potassium-transporting ATPase subunit C             | -2.9 |
| STM1139   | <i>csgG</i> | curli operon transcriptional regulator              | -2.9 |
| STM4196   | STM4196     | hypothetical protein                                | -2.9 |
| STM4514.S | <i>yjiH</i> | inner membrane protein                              | -2.9 |
| STM1032   | STM1032     | hypothetical protein                                | -2.9 |
| STM2808   | <i>nrdF</i> | ribonucleotide-diphosphate reductase subunit beta   | -2.9 |
| STM1031   | STM1031     | hypothetical protein                                | -2.8 |
| STM1696   | <i>sapF</i> | peptide transport protein                           | -2.8 |
| STM0993   | <i>mukE</i> | condesin subunit E                                  | -2.7 |
| STM3114   | <i>speC</i> | ornithine decarboxylase                             | -2.7 |
| STM3588   | <i>yhiN</i> | hypothetical protein                                | -2.7 |
| STM4076   | <i>ydeZ</i> | sugar transport protein                             | -2.7 |
| STM2499.S | <i>purM</i> | phosphoribosylaminoimidazole synthetase             | -2.7 |
| STM3872   | <i>atpI</i> | F0F1 ATP synthase subunit I                         | -2.6 |
| STM3242   | <i>tdcD</i> | propionate/acetate kinase                           | -2.6 |
| STM4538   | STM4538     | PTS permease                                        | -2.6 |
| STM1905   | <i>yecO</i> | SAM-dependent methyltransferase                     | -2.6 |
| STM0171   | <i>yadF</i> | carbonic anhydrase                                  | -2.6 |
| STM3657   | STM3657     | outer membrane lipoprotein                          | -2.6 |
| STM4266   | <i>soxR</i> | redox-sensing transcriptional activator             | -2.6 |
| STM0419   | <i>thiL</i> | thiamine monophosphate kinase                       | -2.6 |
| STM1516   | <i>ydeE</i> | MFS-type transporter YdeE                           | -2.6 |
| STM3527   | STM3527     | hypothetical protein                                | -2.6 |
| STM3971   | <i>yigP</i> | inner membrane protein                              | -2.6 |
| STM2434   | STM2434     | hypothetical protein                                | -2.6 |
| STM3144   | <i>hypA</i> | hydrogenase nickel incorporation protein HybF       | -2.6 |
| STM4481   | <i>idnR</i> | L-idonate regulator                                 | -2.6 |
| STM1908   | <i>yecM</i> | hypothetical protein                                | -2.6 |
| STM1701   | <i>yciW</i> | hypothetical protein                                | -2.6 |
| STM2530   | STM2530     | anaerobic dimethylsulfoxide reductase               | -2.6 |
| STM1911   | STM1911     | hypothetical protein                                | -2.6 |
| STM1083   | <i>yccX</i> | acylphosphatase                                     | -2.6 |
| STM3628   | <i>dppC</i> | dipeptide transporter                               | -2.6 |
| STM3064   | <i>iciA</i> | chromosome replication initiation inhibitor protein | -2.6 |
| STM3623   | <i>yhjT</i> | inner membrane protein                              | -2.6 |
| STM1515   | <i>ydeI</i> | hypothetical protein                                | -2.5 |
| STM1392   | <i>ssrA</i> | sensor kinase                                       | -2.5 |
| STM1754   | <i>yehK</i> | hypothetical protein                                | -2.5 |
| STM4286   | <i>lpxO</i> | dioxygenase                                         | -2.5 |
| STM3585   | <i>yhhJ</i> | ABC transport protein                               | -2.5 |
| STM4550   | <i>fhuF</i> | ferric hydroximate transport ferric iron reductase  | -2.5 |
| STM0111   | <i>leuC</i> | isopropylmalate isomerase large subunit             | -2.5 |

|          |              |                                                   |      |
|----------|--------------|---------------------------------------------------|------|
| STM1496  | STM1496      | dimethylsulfoxide reductase                       | -2.5 |
| STM1153  | <i>msyB</i>  | hypothetical protein                              | -2.5 |
| STM0838  | <i>ybiT</i>  | ABC transporter ATPase                            | -2.5 |
| STM0395  | <i>sbcC</i>  | exonuclease subunit SbcC                          | -2.5 |
| STM0050  | STM0050      | nitrite reductase                                 | -2.5 |
| STM3868  | <i>atpH</i>  | F0F1 ATP synthase subunit delta                   | -2.5 |
| STM0306  | STM0306      | adhesin/invasin protein PagN                      | -2.4 |
| STM0363  | STM0363      | transcriptional regulator                         | -2.4 |
| STM2498  | <i>upp</i>   | uracil phosphoribosyltransferase                  | -2.4 |
| STM3555  | <i>ugpE</i>  | glycerol-3-phosphate transporter membrane protein | -2.4 |
| STM2913  | STM2913      | permease                                          | -2.4 |
| STM0244  | <i>rcsF</i>  | outer membrane lipoprotein                        | -2.4 |
| STM0431  | <i>phnW</i>  | 2-aminoethylphosphonate--pyruvate transaminase    | -2.4 |
| STM1068  | <i>lonH</i>  | protease                                          | -2.4 |
| STM1868A | STM1868A     | lytic enzyme                                      | -2.4 |
| STM0820  | <i>rhlE</i>  | ATP-dependent RNA helicase RhlE                   | -2.4 |
| STM4574  | STM4574      | outer membrane protein                            | -2.4 |
| STM0874  | <i>mdaA</i>  | nitroreductase A                                  | -2.4 |
| STM4316  | STM4316      | hypothetical protein                              | -2.4 |
| STM2088  | <i>rfbX</i>  | O-antigen transferase                             | -2.4 |
| STM1437  | <i>ydhM</i>  | transcriptional repressor                         | -2.4 |
| STM0353  | STM0353      | cation transport ATPase                           | -2.4 |
| STM1250  | STM1250      | hypothetical protein                              | -2.4 |
| STM4066  | STM4066      | aminoimidazole riboside kinase                    | -2.4 |
| STM1388  | <i>orf70</i> | hypothetical protein                              | -2.4 |
| STM4457  | STM4457      | transposase                                       | -2.4 |
| STM1767  | <i>narL</i>  | transcriptional regulator NarL                    | -2.4 |
| STM2940  | STM2940      | hypothetical protein                              | -2.4 |
| STM0510  | <i>sfbA</i>  | ABC transporter ATPase                            | -2.4 |
| STM1598  | <i>ydcR</i>  | regulatory protein                                | -2.4 |
| STM1593  | <i>srfA</i>  | virulence protein                                 | -2.4 |
| STM4347  | <i>yjeP</i>  | hypothetical protein                              | -2.4 |
| STM3205  | <i>uppP</i>  | undecaprenyl pyrophosphate phosphatase            | -2.4 |
| STM4555  | <i>leuQ</i>  | tRNA-Leu                                          | -2.4 |
| STM0514  | <i>ybbS</i>  | DNA-binding transcriptional activator AIIIS       | -2.4 |
| STM1198  | <i>pabC</i>  | 4-amino-4-deoxychorismate lyase                   | -2.4 |
| STM0992  | <i>mukF</i>  | condesin subunit F                                | -2.4 |
| STM2453  | STM2453      | hypothetical protein                              | -2.4 |
| STM0159  | STM0159      | restriction endonuclease                          | -2.4 |
| STM1193  | <i>fabH</i>  | 3-oxoacyl-ACP synthase                            | -2.4 |
| STM1082  | STM1082      | regulatory protein                                | -2.3 |
| STM4588  | <i>creB</i>  | DNA-binding response regulator CreB               | -2.3 |
| STM2349  | <i>yfcG</i>  | glutathione S-transferase                         | -2.3 |
| STM0145  | <i>nadC</i>  | quinolinate phosphoribosyltransferase             | -2.3 |
| STM0094  | <i>djlA</i>  | Dna-J like membrane chaperone protein             | -2.3 |

|           |             |                                                                                       |      |
|-----------|-------------|---------------------------------------------------------------------------------------|------|
| STM0184   | <i>pcnB</i> | poly(A) polymerase I                                                                  | -2.3 |
| STM2111   | <i>wcaE</i> | glycosyl transferase family protein                                                   | -2.3 |
| STM1823   | <i>yoaH</i> | hypothetical protein                                                                  | -2.3 |
| STM2082   | <i>rfbP</i> | undecaprenol-phosphate galactosephosphotransferase/O-antigen transferase              | -2.3 |
| STM1738   | <i>yciI</i> | YciI-like protein                                                                     | -2.3 |
| STM3237   | <i>yhaL</i> | hypothetical protein                                                                  | -2.3 |
| STM3315   | <i>yrbH</i> | D-arabinose 5-phosphate isomerase                                                     | -2.3 |
| STM0871   | <i>ybjM</i> | inner membrane protein                                                                | -2.3 |
| STM2930   | <i>ispD</i> | 2-C-methyl-D-erythritol 4-phosphate cytidyltransferase                                | -2.3 |
| STM0311   | <i>yafJ</i> | glutamine amidotransferase                                                            | -2.3 |
| STM4398   | <i>cycA</i> | D-alanine/D-serine/glycine permease                                                   | -2.3 |
| STM2958   | <i>barA</i> | hybrid sensory histidine kinase BarA                                                  | -2.3 |
| STM3129   | STM3129     | NAD-dependent aldehyde dehydrogenase                                                  | -2.3 |
| STM2674   | <i>trmD</i> | tRNA (guanine-N(1)-)-methyltransferase                                                | -2.2 |
| STM2480   | <i>narQ</i> | nitrate/nitrite sensor protein NarQ                                                   | -2.2 |
| STM3928   | <i>wecF</i> | common antigen polymerase                                                             | -2.2 |
| STM3164   | <i>yqhD</i> | alcohol dehydrogenase                                                                 | -2.2 |
| STM3528   | STM3528     | phosphate-binding protein                                                             | -2.2 |
| STM1984   | <i>yodD</i> | hypothetical protein                                                                  | -2.2 |
| STM0938   | <i>ybjE</i> | inner membrane protein                                                                | -2.2 |
| STM3503   | <i>greB</i> | transcription elongation factor GreB                                                  | -2.2 |
| STM3524   | <i>glpG</i> | intramembrane serine protease GlpG                                                    | -2.2 |
| STM0986   | <i>ycaQ</i> | hypothetical protein                                                                  | -2.2 |
| STM3944   | STM3944     | inner membrane protein                                                                | -2.2 |
| STM0727   | STM0727     | hypothetical protein                                                                  | -2.2 |
| STM4056.S | <i>yiiM</i> | hypothetical protein                                                                  | -2.2 |
| STM3847   | <i>ydY</i>  | multidrug efflux system protein MdtL                                                  | -2.2 |
| STM0847   | <i>ybiK</i> | L-asparaginase                                                                        | -2.2 |
| STM1151   | <i>mdoH</i> | glucosyltransferase MdoH                                                              | -2.2 |
| STM1011   | STM1011     | hypothetical protein                                                                  | -2.2 |
| STM0678   | <i>leuW</i> | tRNA-Leu                                                                              | -2.2 |
| STM0535   | <i>lpxH</i> | UDP-2,3-diacylglucosamine hydrolase                                                   | -2.2 |
| STM3607   | <i>yhjC</i> | transcriptional regulator                                                             | -2.2 |
| STM3549   | STM3549     | inner membrane protein                                                                | -2.2 |
| STM3989   | <i>ileT</i> | tRNA-Ile                                                                              | -2.2 |
| STM3560   | <i>livF</i> | leucine/isoleucine/valine transporter ATP-binding subunit                             | -2.2 |
| STM2312   | <i>elaA</i> | hypothetical protein                                                                  | -2.2 |
| STM0584   | <i>entD</i> | phosphopantetheinyltransferase component of enterobactin synthase multienzyme complex | -2.2 |
| STM0936   | <i>hcr</i>  | HCP oxidoreductase                                                                    | -2.2 |
| STM4079.S | <i>yneC</i> | autoinducer-2 (AI-2) modifying protein LsrG                                           | -2.2 |
| STM3956   | <i>yigI</i> | hypothetical protein                                                                  | -2.2 |
| STM2254   | <i>ccmA</i> | cytochrome c biogenesis protein CcmA                                                  | -2.2 |
| STM4420   | STM4420     | inner membrane protein                                                                | -2.2 |
| STM2783   | <i>nixA</i> | nickel transporter                                                                    | -2.2 |



|            |               |                                                                                             |      |
|------------|---------------|---------------------------------------------------------------------------------------------|------|
| STM1517    | <i>ydeD</i>   | O-acetylserine/cysteine export protein                                                      | -2.2 |
| STM2796    | <i>yqaE</i>   | transporter                                                                                 | -2.2 |
| STM3215    | <i>yqjI</i>   | transcriptional regulator                                                                   | -2.2 |
| STM4376    | <i>yjfC</i>   | glutathionylspermidine synthase                                                             | -2.2 |
| STM1613    | STM1613       | PTS system enzyme IIB component                                                             | -2.2 |
| STM1618    | STM1618       | transcriptional repressor of <i>sgc</i> operon                                              | -2.2 |
| STM1322    | <i>yniC</i>   | 2-deoxyglucose-6-phosphatase                                                                | -2.2 |
| STM3113    | <i>nupG</i>   | nucleoside transport                                                                        | -2.2 |
| STM2439    | <i>yfeL</i>   | membrane carboxypeptidase                                                                   | -2.2 |
| STM0359    | STM0359       | hypothetical protein                                                                        | -2.2 |
| STM0345    | STM0345       | inner membrane protein                                                                      | -2.2 |
| STM0343    | STM0343       | hypothetical protein                                                                        | -2.2 |
| STM4517    | <i>yjiO</i>   | transporter                                                                                 | -2.2 |
| STM3098    | STM3098       | transcriptional regulator                                                                   | -2.2 |
| STM4523    | <i>yjiW</i>   | endoribonuclease SymE                                                                       | -2.2 |
| STM2252    | <i>ccmC</i>   | heme exporter protein                                                                       | -2.2 |
| STM2128    | <i>yegO</i>   | multidrug efflux system subunit MdtC                                                        | -2.2 |
| STM4477    | <i>pepA</i>   | leucyl aminopeptidase                                                                       | -2.2 |
| STM4353    | <i>glyX</i>   | tRNA-Gly                                                                                    | -2.2 |
| STM4423    | STM4423       | DNA-binding protein                                                                         | -2.2 |
| STM4451    | <i>nrdG</i>   | anaerobic ribonucleotide reductase-activating protein                                       | -2.2 |
| STM2854    | <i>hypA</i>   | hydrogenase nickel incorporation protein                                                    | -2.2 |
| STM1482    | <i>ydgF</i>   | multidrug efflux system protein MdtJ                                                        | -2.2 |
| STM4472    | <i>ytgA</i>   | inner membrane protein                                                                      | -2.2 |
| STM1390    | <i>orf242</i> | regulatory protein                                                                          | -2.2 |
| STM2294    | <i>yfaZ</i>   | inner membrane protein                                                                      | -2.2 |
| STM3324    | <i>ptsO</i>   | phosphohistidinoprotein-hexose phosphotransferase component of N-regulated PTS system (Npr) | -2.2 |
| STM2008    | STM2008       | hypothetical protein                                                                        | -2.2 |
| STM3374.1n | STM3374.1n    | hypothetical protein                                                                        | -2.2 |
| STM2262    | <i>eco</i>    | ecotin                                                                                      | -2.2 |
| STM1472    | STM1472       | hypothetical protein                                                                        | -2.2 |
| STM1826    | <i>sdaA</i>   | L-serine deaminase I/L-threonine deaminase I                                                | -2.1 |
| STM1814    | <i>minC</i>   | septum formation inhibitor                                                                  | -2.1 |
| STM2944    | <i>ygcB</i>   | helicase                                                                                    | -2.1 |
| STM1307    | <i>astE</i>   | succinylglutamate desuccinylase                                                             | -2.1 |
| STM1049    | STM1049       | tail fiber protein                                                                          | -2.1 |
| STM3112    | <i>mltC</i>   | murein transglycosylase C                                                                   | -2.1 |
| STM3593    | <i>yhiQ</i>   | methyltransferase                                                                           | -2.1 |
| STM3334    | STM3334       | cytosine deaminase                                                                          | -2.1 |
| STM2364    | <i>dedD</i>   | hypothetical protein                                                                        | -2.1 |
| STM3498    | <i>hslO</i>   | Hsp33-like chaperonin                                                                       | -2.1 |
| STM4294    | <i>yjdE</i>   | arginine:agmatin antiporter                                                                 | -2.1 |
| STM1691    | <i>pspF</i>   | phage shock protein operon transcriptional activator                                        | -2.1 |
| STM2685    | <i>smpA</i>   | hypothetical protein                                                                        | -2.1 |

|         |             |                                                                        |      |
|---------|-------------|------------------------------------------------------------------------|------|
| STM3794 | STM3794     | regulatory protein                                                     | -2.1 |
| STM1617 | STM1617     | epimerase                                                              | -2.1 |
| STM3955 | <i>rarD</i> | chloramphenicol resistance                                             | -2.1 |
| STM3619 | <i>bcsA</i> | cellulose synthase catalytic subunit                                   | -2.1 |
| STM2858 | <i>hypE</i> | hydrogenase formation protein                                          | -2.1 |
| STM2282 | <i>glpQ</i> | glycerophosphodiester phosphodiesterase                                | -2.1 |
| STM0212 | STM0212     | inner membrane protein                                                 | -2.1 |
| STM2487 | <i>purC</i> | phosphoribosylaminoimidazole-succinocarboxamide synthase               | -2.1 |
| STM0760 | <i>aroG</i> | phospho-2-dehydro-3-deoxyheptonate aldolase                            | -2.1 |
| STM1355 | <i>ydiP</i> | transcriptional regulator                                              | -2.0 |
| STM0333 | STM0333     | transcriptional regulator                                              | -2.0 |
| STM3900 | <i>ilvL</i> | ilvG operon leader peptide                                             | -2.0 |
| STM0801 | <i>ybhK</i> | hypothetical protein                                                   | -2.0 |
| STM3754 | STM3754     | hypothetical protein                                                   | -2.0 |
| STM4223 | <i>yjbF</i> | outer membrane lipoprotein                                             | -2.0 |
| STM0086 | <i>kefC</i> | glutathione-regulated potassium-efflux system protein KefC             | -2.0 |
| STM2584 | <i>gogB</i> | hypothetical protein                                                   | -2.0 |
| STM2157 | <i>yehS</i> | hypothetical protein                                                   | -2.0 |
| STM1582 | <i>nhoA</i> | arylamine N-acetyltransferase                                          | -2.0 |
| STM1931 | <i>araH</i> | intracellular protease/amidase                                         | -2.0 |
| STM1797 | <i>ymgE</i> | transglycosylase-associated protein                                    | -2.0 |
| STM3946 | <i>yifL</i> | outer membrane lipoprotein                                             | -2.0 |
| STM0459 | <i>ybaO</i> | transcriptional regulator                                              | -2.0 |
| STM0424 | <i>xseB</i> | exodeoxyribonuclease VII small subunit                                 | -2.0 |
| STM1450 | <i>pdxY</i> | pyridoxamine kinase                                                    | -2.0 |
| STM2016 | <i>cobT</i> | nicotinate-nucleotide--dimethylbenzimidazole phosphoribosyltransferase | -2.0 |
| STM2485 | <i>ypfI</i> | acetyltransferase                                                      | -2.0 |
| STM3799 | STM3799     | hypothetical protein                                                   | -2.0 |
| STM2596 | STM2596     | minor tail-like protein                                                | -2.0 |
| STM1489 | <i>bioD</i> | dithiobiotin synthetase                                                | -2.0 |

### Up-regulated genes

| Locus   | Gene name     | Function                                     | Fold change |
|---------|---------------|----------------------------------------------|-------------|
| STM3933 | <i>leuT</i>   | tRNA-Leu                                     | 12.3        |
| STM1399 | <i>ssaA</i>   | secretion system chaperone                   | 12.3        |
| STM3890 | <i>gltU</i>   | tRNA-Glu                                     | 10.5        |
| STM3238 | <i>yhaN</i>   | inner membrane protein                       | 9.6         |
| STM3350 | STM3350       | inner membrane protein                       | 8.9         |
| STM3829 | <i>dgoK</i>   | 2-oxo-3-deoxygalactonate kinase              | 8.2         |
| STM1280 | <i>yeaL</i>   | inner membrane protein                       | 8.2         |
| STM0642 | <i>ybeB</i>   | hypothetical protein                         | 6.8         |
| STM4516 | <i>yjiN</i>   | inner membrane protein                       | 6.8         |
| STM2782 | <i>mig-14</i> | transcriptional activator                    | 6.8         |
| STM0173 | <i>yadH</i>   | transporter                                  | 6.8         |
| STM2842 | <i>hypF</i>   | hydrogenase maturation protein               | 6.8         |
| STM0163 | <i>pdxA</i>   | 4-hydroxythreonine-4-phosphate dehydrogenase | 6.5         |

|           |             |                                                                      |     |
|-----------|-------------|----------------------------------------------------------------------|-----|
| STM0135   | <i>yacA</i> | SecA regulator SecM                                                  | 6.2 |
| STM2448   | <i>yfeZ</i> | inner membrane protein                                               | 5.5 |
| STM3932   | <i>hisR</i> | tRNA-His                                                             | 5.5 |
| STM0387   | <i>yaiI</i> | hypothetical protein                                                 | 5.5 |
| STM4549   | STM4549     | hypothetical protein                                                 | 5.5 |
| STM3133   | STM3133     | amidohydrolase                                                       | 5.5 |
| STM4593   | <i>sthB</i> | fimbrial usher protein                                               | 5.5 |
| STM0268   | STM0268     | hypothetical protein                                                 | 5.5 |
| STM1050   | STM1050     | tail fiber assembly like-protein                                     | 5.5 |
| STM2288   | STM2288     | hypothetical protein                                                 | 5.5 |
| STM0183   | <i>folK</i> | 2-amino-4-hydroxy-6- hydroxymethyldihydropteridine pyrophosphokinase | 5.5 |
| STM0006   | <i>yaaJ</i> | alanine/glycine transport protein                                    | 5.5 |
| STM0001   | <i>thrL</i> | thr operon leader peptide                                            | 4.8 |
| STM1352   | <i>ydiS</i> | hypothetical protein                                                 | 4.8 |
| STM1269   | STM1269     | chorismate mutase                                                    | 4.8 |
| STM3645   | <i>viaD</i> | outer membrane lipoprotein                                           | 4.8 |
| STM2836   | <i>gutM</i> | DNA-binding transcriptional activator GutM                           | 4.8 |
| STM4298   | <i>melA</i> | alpha-galactosidase                                                  | 4.8 |
| STM0511   | <i>sfbB</i> | ABC transporter ATPase                                               | 4.6 |
| STM2628   | STM2628     | regulatory protein                                                   | 4.5 |
| STM0991   | <i>smtA</i> | metallothionein SmtA                                                 | 4.4 |
| STM3169   | STM3169     | periplasmic dicarboxylate-binding protein                            | 4.4 |
| STM1762   | <i>narJ</i> | nitrate reductase 1 delta subunit                                    | 4.4 |
| STM0095   | <i>rluA</i> | 23S rRNA/tRNA pseudouridine synthase A                               | 4.4 |
| STM4571   | STM4571     | outer membrane protein                                               | 4.1 |
| STM2139   | STM2139     | inner membrane protein                                               | 4.1 |
| STM1874   | STM1874     | inner membrane protein                                               | 4.1 |
| STM1877   | STM1877     | amidohydrolase                                                       | 4.1 |
| STM2612   | STM2612     | morphogenesis-like protein                                           | 4.1 |
| STM2503   | STM2503     | diguanylate cyclase                                                  | 4.1 |
| STM2747   | STM2747     | hypothetical protein                                                 | 4.1 |
| STM3387   | <i>yhdU</i> | hypothetical protein                                                 | 4.1 |
| STM0907   | STM0907     | chitinase                                                            | 4.1 |
| STM0263   | <i>rnhA</i> | ribonuclease H                                                       | 4.1 |
| STM1523   | <i>yneJ</i> | transcriptional regulator                                            | 4.1 |
| STM4278.S | <i>nrfB</i> | cytochrome c nitrite reductase pentaheme subunit                     | 4.1 |
| STM0646   | <i>holA</i> | DNA polymerase III subunit delta                                     | 4.1 |
| STM0794   | <i>bioB</i> | biotin synthetase                                                    | 4.1 |
| STM3275.S | <i>yhbV</i> | protease                                                             | 4.1 |
| STM1442   | <i>ydhJ</i> | multidrug resistance efflux pump                                     | 4.1 |
| STM0859   | STM0859     | transcriptional regulator                                            | 4.1 |
| STM3792   | STM3792     | L-fucose permease                                                    | 4.1 |
| STM4399   | <i>ytfE</i> | iron-sulfur cluster repair di-iron protein                           | 4.1 |
| STM1974   | <i>fliK</i> | flagellar hook-length control protein                                | 3.9 |
| STM2306   | <i>menC</i> | O-succinylbenzoate synthase                                          | 3.8 |

|           |             |                                                        |     |
|-----------|-------------|--------------------------------------------------------|-----|
| STM4469   | <i>argI</i> | ornithine carbamoyltransferase subunit I               | 3.8 |
| STM0821   | <i>dinG</i> | ATP-dependent DNA helicase DinG                        | 3.7 |
| STM1397   | <i>sseA</i> | secretion system chaperone protein                     | 3.7 |
| STM2202   | <i>yeiH</i> | inner membrane protein                                 | 3.7 |
| STM3986   | <i>trkH</i> | potassium transporter                                  | 3.7 |
| STM4287.S | <i>phnO</i> | aminoalkylphosphonic acid N-acetyltransferase          | 3.7 |
| STM4591   | <i>sthE</i> | major fimbrial subunit                                 | 3.4 |
| STM4554   | <i>leuP</i> | tRNA-Leu                                               | 3.4 |
| STM0185   | <i>yadB</i> | glutamyl-Q tRNA(Asp) synthetase                        | 3.4 |
| STM1973   | <i>fliJ</i> | flagellar biosynthesis chaperone                       | 3.4 |
| STM2938   | STM2938     | hypothetical protein                                   | 3.4 |
| STM4308   | STM4308     | anaerobic dehydrogenase component                      | 3.4 |
| STM4435   | STM4435     | hypothetical protein                                   | 3.4 |
| STM1522   | <i>ydeA</i> | sugar efflux transporter                               | 3.4 |
| STM1794   | STM1794     | membrane protein                                       | 3.4 |
| STM4319   | <i>phoN</i> | non-specific acid phosphatase                          | 3.4 |
| STM1549   | STM1549     | translation initiation inhibitor                       | 3.4 |
| STM3178   | <i>ygiY</i> | sensor protein QseC                                    | 3.4 |
| STM3168   | <i>ygiR</i> | hypothetical protein                                   | 3.4 |
| STM1821   | <i>yoaA</i> | DNA helicase                                           | 3.4 |
| STM1913   | <i>flhA</i> | flagellar biosynthesis protein FlhA                    | 3.4 |
| STM0229   | <i>lpxB</i> | lipid-A-disaccharide synthase                          | 3.4 |
| STM4511   | <i>yjiE</i> | DNA-binding transcriptional regulator                  | 3.4 |
| STM3441   | <i>rpsJ</i> | 30S ribosomal protein S10                              | 3.4 |
| STM0023   | <i>bcfC</i> | fimbrial usher                                         | 3.4 |
| STM2394   | <i>argW</i> | tRNA-Arg                                               | 3.4 |
| STM4263   | <i>yjcB</i> | inner membrane protein                                 | 3.4 |
| STM4186   | STM4186     | hypothetical protein                                   | 3.4 |
| STM3828   | <i>dgoA</i> | galactonate dehydratase                                | 3.4 |
| STM2794   | <i>ygaE</i> | DNA-binding transcriptional regulator CsiR             | 3.4 |
| STM2496   | <i>yfgE</i> | DNA replication initiation factor                      | 3.4 |
| STM1994   | STM1994     | inner membrane protein                                 | 3.4 |
| STM0681   | <i>nagD</i> | UMP phosphatase                                        | 3.3 |
| STM0881   | <i>ybjO</i> | inner membrane protein                                 | 3.2 |
| STM0254   | <i>aspU</i> | tRNA-Asp                                               | 3.2 |
| STM2945   | <i>sopD</i> | secreted effector protein                              | 3.1 |
| STM0877   | <i>potF</i> | putrescine ABC transporter periplasmic-binding protein | 3.1 |
| STM1134   | <i>serX</i> | tRNA-Ser                                               | 3.1 |
| STM4090   | <i>menA</i> | 1,4-dihydroxy-2-naphthoate octaprenyltransferase       | 3.1 |
| STM3346   | <i>yhcM</i> | ATPase                                                 | 3.1 |
| STM1228   | STM1228     | hypothetical protein                                   | 3.1 |
| STM3612   | <i>kdgK</i> | ketodeoxygluconokinase                                 | 3.1 |
| STM0041   | STM0041     | glycosyl hydrolase                                     | 3.1 |
| STM2199   | <i>cirA</i> | colicin I receptor                                     | 3.1 |
| STM2654   | <i>kgtP</i> | alpha-ketoglutarate transporter                        | 3.1 |

|         |              |                                                                          |     |
|---------|--------------|--------------------------------------------------------------------------|-----|
| STM1170 | <i>mviN</i>  | virulence protein                                                        | 3.0 |
| STM4508 | <i>trpS2</i> | tryptophanyl-tRNA synthetase II                                          | 3.0 |
| STM3118 | STM3118      | acetyl-CoA hydrolase                                                     | 3.0 |
| STM3926 | <i>wzxE</i>  | O-antigen translocase                                                    | 3.0 |
| STM3644 | <i>bisC</i>  | biotin sulfoxide reductase                                               | 3.0 |
| STM1202 | <i>ycfH</i>  | metallodependent hydrolase                                               | 3.0 |
| STM3475 | <i>nirD</i>  | nitrite reductase small subunit                                          | 3.0 |
| STM2026 | <i>cbiJ</i>  | cobalt-precorrin-6x reductase                                            | 3.0 |
| STM3765 | <i>yicL</i>  | permease                                                                 | 3.0 |
| STM2570 | STM2570      | phosphotransferase system IIB component                                  | 3.0 |
| STM4252 | STM4252      | inner membrane protein                                                   | 3.0 |
| STM2129 | <i>yegB</i>  | multidrug efflux system protein MdtE                                     | 2.9 |
| STM1693 | <i>sapB</i>  | peptide transport protein                                                | 2.9 |
| STM1491 | <i>osmV</i>  | proline/glycine betaine transport systems                                | 2.9 |
| STM1499 | STM1499      | dimethyl sulfoxide reductase subunit A                                   | 2.8 |
| STM0201 | STM0201      | outer membrane protein                                                   | 2.7 |
| STM2309 | <i>menD</i>  | 2-succinyl-5-enolpyruvyl-6-hydroxy-3- cyclohexene-1-carboxylate synthase | 2.7 |
| STM1687 | <i>pspD</i>  | peripheral inner membrane phage-shock protein                            | 2.7 |
| STM2021 | <i>cbiQ</i>  | vitamin B12 biosynthetic protein                                         | 2.7 |
| STM1024 | STM1024      | hypothetical protein                                                     | 2.7 |
| STM1042 | STM1042      | minor tail protein                                                       | 2.7 |
| STM2679 | <i>yfjD</i>  | hypothetical protein                                                     | 2.7 |
| STM1084 | <i>yccK</i>  | sulfur transfer protein TusE                                             | 2.7 |
| STM4031 | STM4031      | hypothetical protein                                                     | 2.7 |
| STM0626 | <i>dpiA</i>  | two-component response regulator DpiA                                    | 2.7 |
| STM0621 | <i>citF</i>  | citrate lyase alpha chain/citrate-ACP transferase                        | 2.7 |
| STM1105 | <i>hpaH</i>  | 4-hydroxyphenylacetate catabolism                                        | 2.7 |
| STM0580 | STM0580      | regulatory protein                                                       | 2.7 |
| STM4112 | <i>frwC</i>  | fructose-like permease EIIC subunit 2                                    | 2.7 |
| STM0564 | STM0564      | pyridine nucleotide-disulfide oxidoreductase                             | 2.7 |
| STM2143 | <i>yegU</i>  | glycohydrolase                                                           | 2.7 |
| STM1201 | <i>holB</i>  | DNA polymerase III subunit delta'                                        | 2.7 |
| STM3574 | <i>yhhM</i>  | inner membrane protein                                                   | 2.7 |
| STM4230 | <i>malK</i>  | maltose/maltodextrin transporter ATP-binding protein                     | 2.7 |
| STM0396 | <i>sbcD</i>  | exonuclease subunit SbcD                                                 | 2.7 |
| STM3102 | <i>yggU</i>  | hypothetical protein                                                     | 2.7 |
| STM2223 | <i>yejH</i>  | ATP-dependent helicase                                                   | 2.7 |
| STM0303 | <i>ybeJ</i>  | xylanase/chitin deacetylase                                              | 2.7 |
| STM3222 | <i>ygjQ</i>  | integral membrane protein                                                | 2.7 |
| STM0331 | STM0331      | fumarylacetoacetate hydrolase                                            | 2.7 |
| STM3284 | <i>truB</i>  | tRNA pseudouridine synthase B                                            | 2.7 |
| STM2031 | <i>cbiE</i>  | cobalt-precorrin-6Y C(5)-methyltransferase                               | 2.7 |
| STM2887 | <i>spaS</i>  | surface presentation of antigens protein SpaS                            | 2.7 |
| STM1410 | STM1410      | hypothetical protein                                                     | 2.7 |

|            |              |                                                  |     |
|------------|--------------|--------------------------------------------------|-----|
| STM1218    | <i>lolD</i>  | lipoprotein transporter ATP-binding subunit      | 2.7 |
| STM3332    | <i>yhcG</i>  | hypothetical protein                             | 2.7 |
| STM2084    | <i>rfbM</i>  | mannose-1-phosphate guanylyltransferase          | 2.7 |
| STM3949    | <i>xerC</i>  | site-specific tyrosine recombinase XerC          | 2.6 |
| STM4032    | STM4032      | acetyl esterase                                  | 2.6 |
| STM1709    | <i>yciS</i>  | inner membrane protein                           | 2.6 |
| STM1586    | STM1586      | hypothetical protein                             | 2.6 |
| STM3372    | <i>mreD</i>  | rod shape-determining protein MreD               | 2.6 |
| STM3712    | <i>rfaC</i>  | ADP-heptose--LPS heptosyltransferase 1           | 2.5 |
| STM2505    | STM2505      | inner membrane protein                           | 2.5 |
| STM4033    | STM4033      | regulatory protein                               | 2.5 |
| STM3608    | <i>yhjD</i>  | tRNA-processing ribonuclease                     | 2.5 |
| STM0426    | <i>phnV</i>  | 2-aminoethylphosphonate transporter              | 2.5 |
| STM4121    | <i>argC</i>  | N-acetyl-gamma-glutamyl-phosphate reductase      | 2.5 |
| STM1379    | <i>orf48</i> | amino acid permease                              | 2.5 |
| STM0968    | <i>ycaD</i>  | MFS family transporter protein                   | 2.5 |
| STM0846    | <i>moeA</i>  | molybdopterin biosynthesis protein MoeA          | 2.5 |
| STM3681    | STM3681      | transcriptional regulator                        | 2.5 |
| STM2597    | STM2597      | major tail-like protein                          | 2.4 |
| STM1498    | STM1498      | dimethyl sulfoxide reductase                     | 2.4 |
| STM3952    | <i>corA</i>  | magnesium/nickel/cobalt transporter CorA         | 2.4 |
| STM4228    | <i>malF</i>  | maltose transporter membrane protein             | 2.4 |
| STM3764    | <i>mgtC</i>  | Mg <sup>2+</sup> transport protein               | 2.4 |
| STM2917    | <i>ygbK</i>  | tRNA synthase                                    | 2.4 |
| STM2619    | STM2619      | hypothetical protein                             | 2.4 |
| STM0878    | <i>potG</i>  | putrescine ABC transporter ATP-binding protein   | 2.4 |
| STM0382    | STM0382      | permease                                         | 2.4 |
| STM3288    | <i>yhbC</i>  | hypothetical protein                             | 2.4 |
| STM2531    | <i>pbpC</i>  | penicillin-binding protein 1C                    | 2.4 |
| STM0410    | STM0410      | regulatory protein                               | 2.4 |
| STM1547    | STM1547      | transcriptional regulator                        | 2.4 |
| STM0802    | <i>moaA</i>  | molybdenum cofactor biosynthesis protein A       | 2.4 |
| STM0406    | <i>yajC</i>  | preprotein translocase subunit YajC              | 2.4 |
| STM3796A.S | STM3796A.S   | integral membrane protein                        | 2.4 |
| STM0619    | <i>citG</i>  | triphosphoribosyl-dephospho-CoA synthase         | 2.4 |
| STM4171    | <i>yjaH</i>  | inner membrane protein                           | 2.4 |
| STM3001    | <i>thyA</i>  | thymidylate synthase                             | 2.4 |
| STM2591    | STM2591      | tail assembly protein K-like                     | 2.4 |
| STM4107    | <i>yijF</i>  | hypothetical protein                             | 2.4 |
| STM1321    | <i>ydjM</i>  | hypothetical protein                             | 2.4 |
| STM3661    | <i>xylA</i>  | xylose isomerase                                 | 2.4 |
| STM1706    | <i>yciH</i>  | translation initiation factor Sui1               | 2.4 |
| STM1771    | <i>chaA</i>  | calcium/sodium:proton antiporter                 | 2.4 |
| STM3055    | <i>gcvT</i>  | glycine cleavage system aminomethyltransferase T | 2.4 |
| STM2768    | STM2768      | transposase                                      | 2.4 |

|         |             |                                                       |     |
|---------|-------------|-------------------------------------------------------|-----|
| STM0618 | <i>citT</i> | citrate/succinate transport antiport protein          | 2.4 |
| STM1857 | STM1857     | acetyltransferase                                     | 2.4 |
| STM2339 | <i>yfcC</i> | hypothetical protein                                  | 2.4 |
| STM2353 | <i>hisQ</i> | histidine/lysine/arginine/ornithine transport protein | 2.4 |
| STM3241 | <i>tdcE</i> | pyruvate formate-lyase 4/2-ketobutyrate formate-lyase | 2.3 |
| STM3523 | <i>glpR</i> | DNA-binding transcriptional repressor GlpR            | 2.3 |
| STM4229 | <i>malE</i> | maltose ABC transporter periplasmic protein           | 2.3 |
| STM2607 | STM2607     | head-to-tail joining-like protein                     | 2.3 |
| STM3199 | <i>yqiK</i> | hypothetical protein                                  | 2.3 |
| STM4485 | <i>idnK</i> | D-gluconate kinase                                    | 2.3 |
| STM4129 | <i>trmA</i> | tRNA (uracil-5-)-methyltransferase                    | 2.3 |
| STM3089 | <i>yqgD</i> | inner membrane protein                                | 2.3 |
| STM1893 | <i>znuB</i> | high-affinity zinc transporter membrane protein       | 2.3 |
| STM1806 | <i>nhaB</i> | sodium/proton antiporter                              | 2.3 |
| STM2630 | STM2630     | hypothetical protein                                  | 2.3 |
| STM4542 | <i>yjjA</i> | hypothetical protein                                  | 2.3 |
| STM0221 | <i>uppS</i> | undecaprenyl pyrophosphate synthase                   | 2.2 |
| STM0950 | STM0950     | SlsA                                                  | 2.2 |
| STM1739 | <i>cls</i>  | cardiolipin synthetase                                | 2.2 |
| STM4317 | STM4317     | hypothetical protein                                  | 2.2 |
| STM1605 | <i>ydcN</i> | repressor                                             | 2.2 |
| STM3373 | <i>mreC</i> | rod shape-determining protein MreC                    | 2.2 |
| STM3467 | <i>yhfK</i> | inner membrane protein                                | 2.2 |
| STM0081 | STM0081     | hypothetical protein                                  | 2.2 |
| STM3341 | <i>sspB</i> | ClpXP protease specificity-enhancing factor           | 2.2 |
| STM3870 | <i>atpE</i> | FOF1 ATP synthase subunit C                           | 2.2 |
| STM0260 | <i>mltD</i> | membrane-bound lytic murein transglycosylase D        | 2.2 |
| STM1937 | <i>tyrP</i> | tyrosine-specific transport protein                   | 2.2 |
| STM0116 | <i>ilvI</i> | acetolactate synthase 3 catalytic subunit             | 2.2 |
| STM2506 | STM2506     | inner membrane protein                                | 2.2 |
| STM1136 | <i>ycdX</i> | hydrolase                                             | 2.2 |
| STM2663 | <i>yfiO</i> | outer membrane protein assembly complex subunit YfiO  | 2.2 |
| STM1059 | <i>ycbW</i> | hypothetical protein                                  | 2.2 |
| STM1731 | STM1731     | catalase                                              | 2.2 |
| STM1735 | <i>yciB</i> | intracellular septation protein A                     | 2.2 |
| STM1188 | STM1188     | inner membrane lipoprotein                            | 2.1 |
| STM4262 | STM4262     | ABC-type bacteriocin/lantibiotic exporter             | 2.1 |
| STM4346 | <i>yjeO</i> | inner membrane protein                                | 2.1 |
| STM1820 | <i>yeaZ</i> | molecular chaperone                                   | 2.1 |
| STM0285 | STM0285     | inner membrane protein                                | 2.1 |
| STM0287 | STM0287     | hypothetical protein                                  | 2.1 |
| STM2275 | STM2275     | regulatory protein                                    | 2.1 |
| STM3124 | STM3124     | response regulator                                    | 2.1 |
| STM3126 | STM3126     | amino acid transporter                                | 2.1 |
| STM1835 | <i>rrmA</i> | 23S rRNA methyltransferase A                          | 2.1 |

|           |             |                                                              |     |
|-----------|-------------|--------------------------------------------------------------|-----|
| STM4320   | STM4320     | regulatory protein                                           | 2.1 |
| STM1761   | <i>narI</i> | nitrate reductase 1 gamma subunit                            | 2.1 |
| STM1773   | <i>ychA</i> | transcriptional regulator                                    | 2.1 |
| STM4365   | <i>yjeT</i> | inner membrane protein                                       | 2.1 |
| STM1898   | <i>ruvC</i> | Holliday junction resolvase                                  | 2.1 |
| STM2973   | <i>fucO</i> | L-1,2-propanediol oxidoreductase                             | 2.1 |
| STM4335   | <i>ecnA</i> | entericidin A precursor                                      | 2.1 |
| STM2989   | <i>metZ</i> | tRNA-Met                                                     | 2.1 |
| STM3079.S | STM3079.S   | hydrolase/acyltransferase                                    | 2.1 |
| STM4304   | <i>dcuS</i> | sensory histidine kinase DcuS                                | 2.1 |
| STM2301   | <i>arnT</i> | 4-amino-4-deoxy-L-arabinose transferase                      | 2.1 |
| STM1789   | STM1789     | hydrogenase 1 maturation protease                            | 2.1 |
| STM3037   | <i>glyU</i> | tRNA-Gly                                                     | 2.1 |
| STM1733   | STM1733     | ferredoxin                                                   | 2.1 |
| STM4143   | <i>tyrU</i> | tRNA-Tyr                                                     | 2.1 |
| STM1401   | <i>sseD</i> | translocation machinery component                            | 2.1 |
| STM3357   | STM3357     | regulatory protein                                           | 2.1 |
| STM0481   | <i>priC</i> | primosomal replication protein N"                            | 2.1 |
| STM4069   | STM4069     | hypothetical protein                                         | 2.1 |
| STM0674   | <i>glnV</i> | tRNA-Gln                                                     | 2.1 |
| STM3374   | <i>mreB</i> | rod shape-determining protein MreB                           | 2.1 |
| STM0503   | <i>ybbM</i> | transporter                                                  | 2.1 |
| STM3994   | <i>mobA</i> | molybdopterin-guanine dinucleotide biosynthesis protein MobA | 2.1 |
| STM3667   | <i>viaJ</i> | transcriptional repressor                                    | 2.1 |
| STM3714   | <i>rfaK</i> | hexose transferase                                           | 2.1 |
| STM0177   | <i>stiA</i> | fimbrial subunit                                             | 2.1 |
| STM0568   | <i>pheP</i> | phenylalanine transporter                                    | 2.1 |
| STM1089   | STM1089     | inner membrane protein                                       | 2.1 |
| STM1093   | STM1093     | hypothetical protein                                         | 2.1 |
| STM0581   | STM0581     | regulatory protein                                           | 2.1 |
| STM2586   | STM2586     | phage tail assembly-like protein                             | 2.1 |
| STM0598   | <i>entA</i> | 2,3-dihydroxybenzoate-2,3-dehydrogenase                      | 2.1 |
| STM3531   | STM3531     | dihydroxyacid dehydratase                                    | 2.1 |
| STM3182   | <i>yqiA</i> | esterase YqiA                                                | 2.1 |
| STM3451   | <i>yheN</i> | sulfur transfer complex subunit TusD                         | 2.1 |
| STM4178   | <i>gltV</i> | tRNA-Glu                                                     | 2.1 |
| STM4449   | STM4449     | bifunctional antitoxin/transcriptional repressor RelB        | 2.1 |
| STM0866   | <i>mdfA</i> | multidrug translocase                                        | 2.1 |
| STM0835   | STM0835     | manganese transport regulator MntR                           | 2.1 |
| STM4594   | <i>sthA</i> | fimbrial chaperone                                           | 2.1 |
| STM3821   | <i>torD</i> | chaperone protein TorD                                       | 2.1 |
| STM3805   | <i>yidH</i> | inner membrane protein                                       | 2.1 |
| STM2824   | STM2824     | tRNA-Arg                                                     | 2.1 |
| STM2511   | <i>guaB</i> | inosine 5'-monophosphate dehydrogenase                       | 2.1 |
| STM2099   | <i>wcaM</i> | colanic acid biosynthesis protein                            | 2.1 |



|         |             |                                      |     |
|---------|-------------|--------------------------------------|-----|
| STM4247 | <i>alr</i>  | alanine racemase                     | 2.1 |
| STM2122 | <i>udk</i>  | uridine kinase                       | 2.1 |
| STM2125 | <i>yegD</i> | chaperone                            | 2.1 |
| STM1488 | <i>mlc</i>  | pts operon transcriptional repressor | 2.1 |
| STM3732 | <i>slmA</i> | nucleoid occlusion protein           | 2.1 |
| STM3461 | STM3461     | hypothetical protein                 | 2.0 |
| STM2097 | <i>rfbB</i> | dTDP-glucose-4,6-dehydratase         | 2.0 |
| STM2145 | <i>yegW</i> | regulatory protein                   | 2.0 |
